# Supplementary material for: Increasing Functionality of Fish Leather by Chemical Surface Modifications
Source: MDPI journal article supplement (doi:10.3390/polym15193904), 2023-09-27
Supplement: s1 [file s1]

## Supporting Information

### Increasing Functionality of Fish Leather by Chemical Surface Modifications

Achiad Zilberfarb, Gali Cohen and Elizabeth Amir\*

*Department of Polymer Materials Engineering, Shenkar College, Ramat-Gan, Israel*

Correspondence: [eamir@shenkar.ac.il](mailto:eamir@shenkar.ac.il)

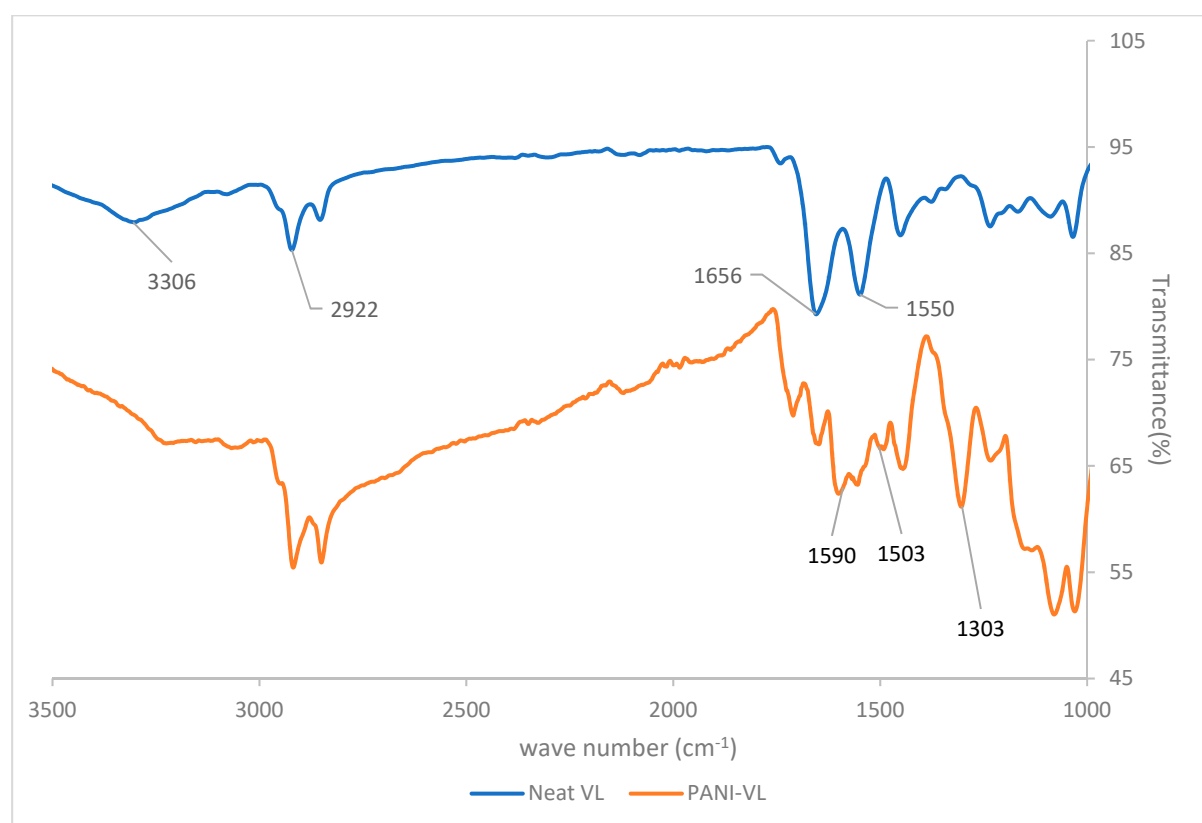

Figure S1. FTIR results neat and PANI coated VL.

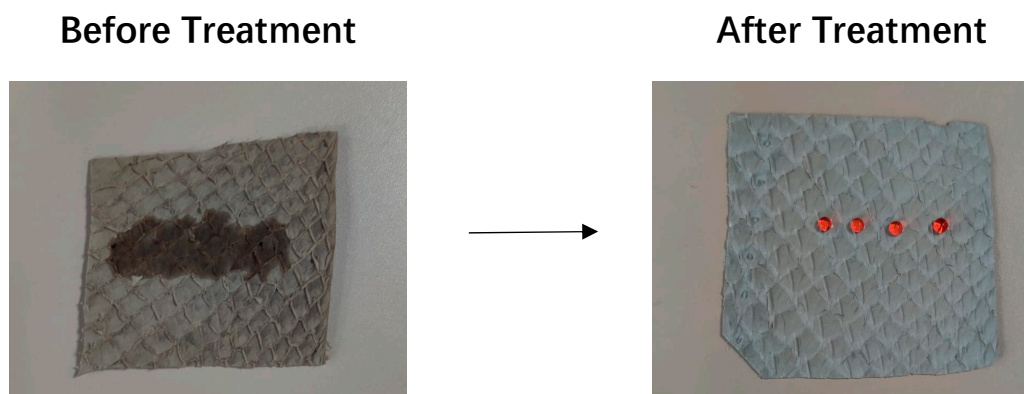

Figure S2. Photographs of VL before and after UC treatment taken using drops of water (dyed red).

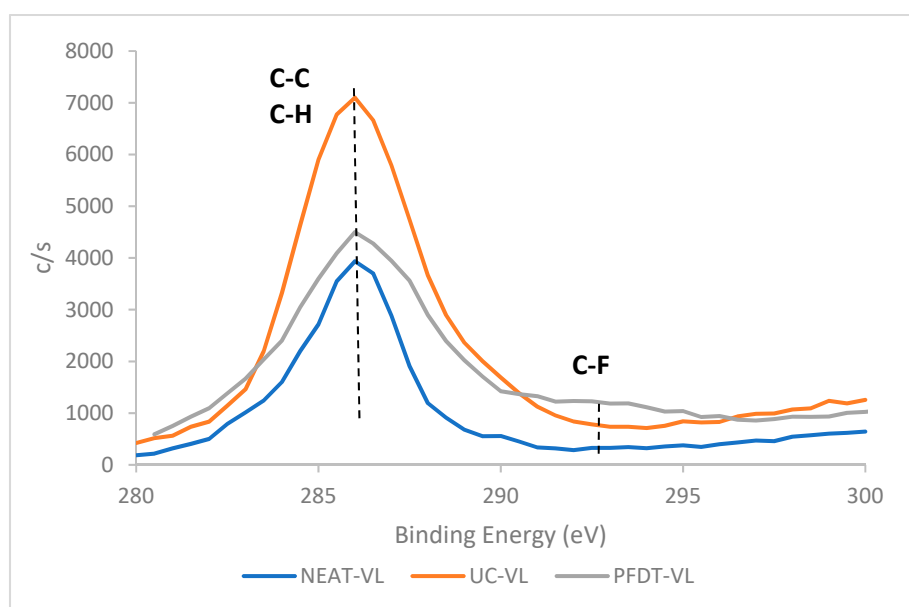

Figure S3. C1s comparison (low resolution) of neat and modified VL.

Neat leather

PVDF-HFP coated leather

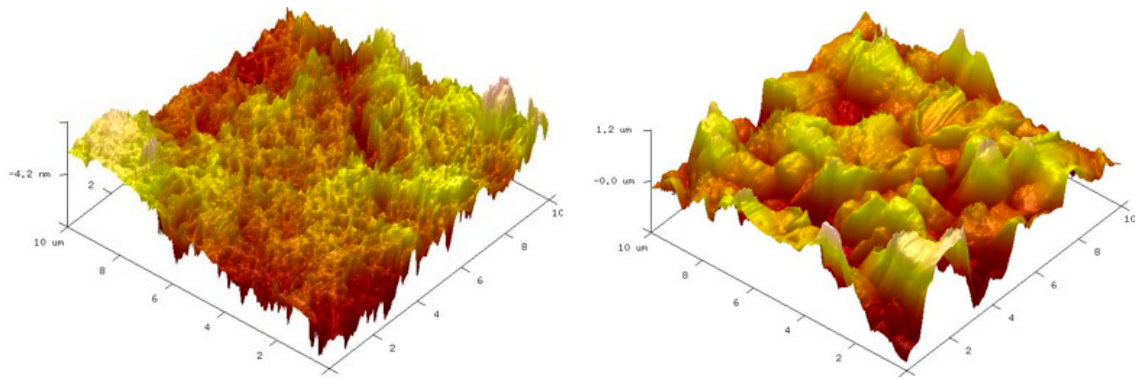

Figure S4. AFM topography photographs demonstrating the change in roughness between neat and coated leather.

Table S1. Collagen fibers diameter measurement of neat and PANI coated CL.

| Sample     | Neat CL<br>( $\mu\text{m}$ ) | PANI CL<br>( $\mu\text{m}$ ) |
|------------|------------------------------|------------------------------|
| 1          | 0.285                        | 0.235                        |
| 2          | 0.202                        | 0.446                        |
| 3          | 0.179                        | 0.331                        |
| 4          | 0.218                        | 0.304                        |
| 5          | 0.135                        | 0.341                        |
| 6          | 0.195                        | 0.206                        |
| 7          | 0.169                        | 0.148                        |
| 8          | 0.19                         | 0.215                        |
| 9          | 0.151                        | 0.39                         |
| 10         | 0.176                        | 0.197                        |
| <b>AVG</b> | <b>0.19</b>                  | <b>0.281</b>                 |
| <b>SD</b>  | <b>0.041</b>                 | <b>0.096</b>                 |

**Neat CL**

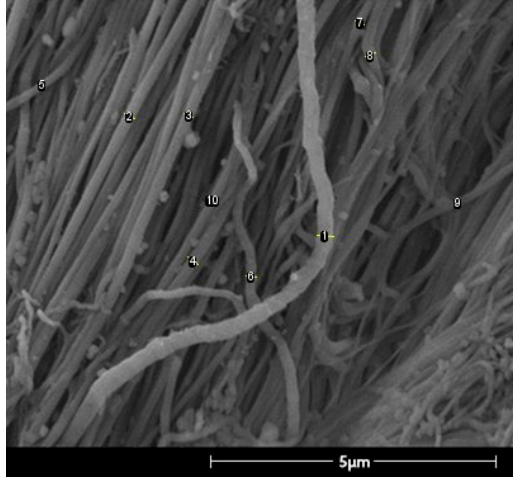

**PANI CL**

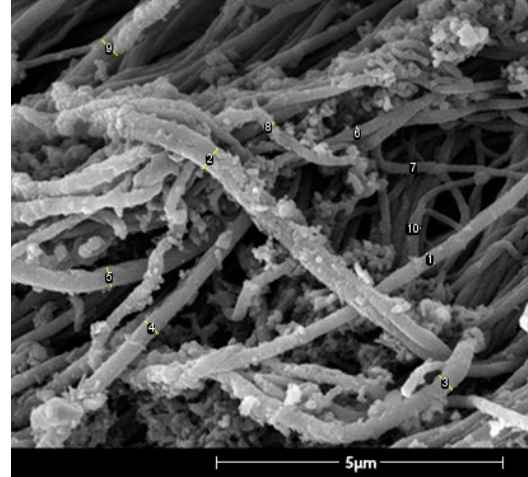

*Figure S5. SEM photographs showing measurements of fibril diameters of neat and PANI coated CL.*

**PVDF-HFP VL**

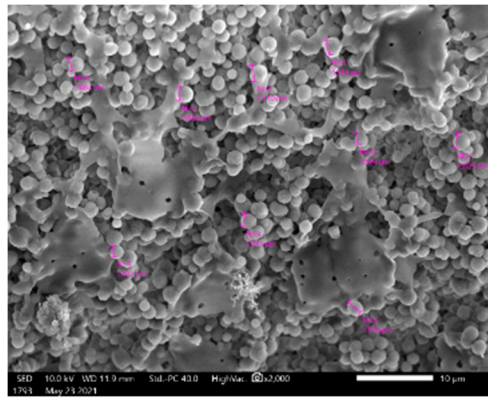

**PVDF-HFP CL**

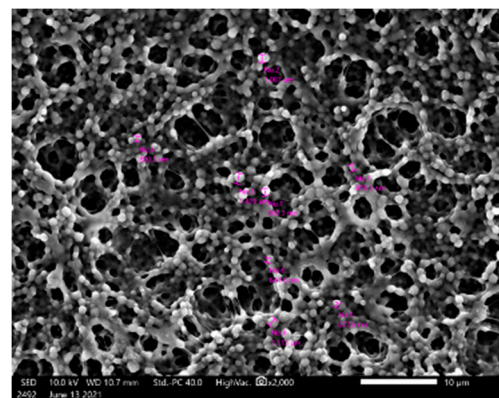

*Figure S6. SEM photographs showing the morphology of CL and VL after PVDF-HFP coating.*
